# Supplementary figures and images for: Estimating the evidence of selection and the reliability of inference in unigenic evolution
Source: Springer Nature journal article supplement (doi:10.1186/1748-7188-5-35), 2010-11-08

Number of **Selected** Clones →

5

10

20

40

87

5

10

20

40

87

Number of **Unselected** Clones ↓

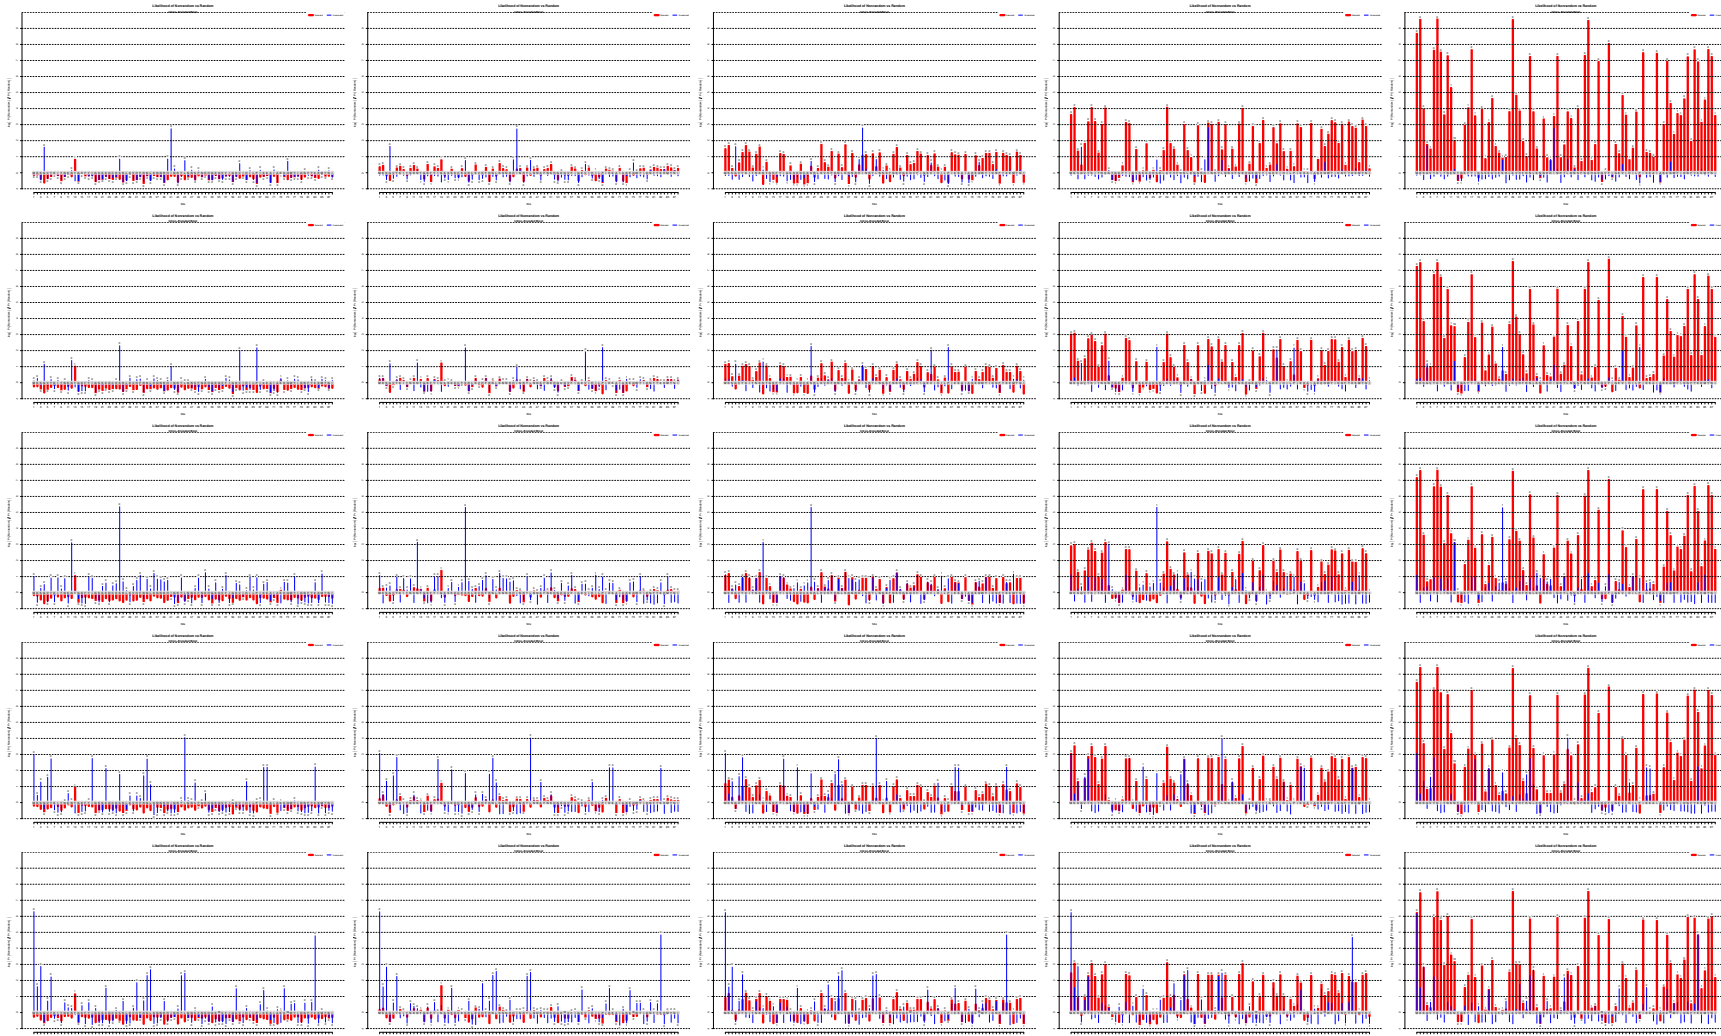

Supplement: Additional file 5 [file 1748-7188-5-35-s5.pdf]
